# Supplementary material
Source: publisher figshare collection journal article supplement (https://acs.figshare.com/ndownloader/files/5395472)
Supplement: Supplementary file 1 [file 5395472]

Compound;SMILE;TRPM8 efficacy (% ionomycin, 4 _M);TRPM8 potency (EC50, _M);IC50 inhibition TRPM8, _M (icilin 0.25 _M);IC50 inhibition TRPA1 _M (AITC 100 _M);IC50 inhibition TRPV1, _M (capsaicin 0.1 _M);IC50 inhibition TRPV2, _M LPC 3 _M);IC50 inhibition TRPV3 (thymol 100 _M);TRPV4 (4_PDD 1_M);CLint, mL/(min.kg), acetaminophen 12.2 
10a;O=C(N1CCC2=CC(OC)=C(OC)C=C2[C@@H]1CCC)N([C@H]3CCC)CCC4=C3C=C(OC)C(OC)=C4;< 10;NA;8.5 ± 2.0;;;;;;
10b;O=C(N1CCC2=CC(OC)=C(OC)C=C2[C@@H]1C3=CC=CC=C3)N([C@H]4C5=CC=CC=C5)CCC6=C4C=C(OC)C(OC)=C6;< 10;NA;0.50 ± 0.02;10.0 ± 2.0;53.0 ± 1.0;51.9 ± 8.0;> 100;82.6 ± 0.1;
10c;O=C(N1CCC2=CC(OC)=C(OC)C=C2[C@@H]1C3=C(Cl)C=CC=C3)N([C@H]4C5=CC=CC=C5Cl)CCC6=C4C=C(OC)C(OC)=C6;< 10;NA;19.8 ± 1.7;;;;;;52.9
10d;O=C(N1CCC2=CC(OC)=C(OC)C=C2[C@@H]1C3=CC([N+]([O-])=O)=CC=C3)N([C@H]4C5=CC=CC([N+]([O-])=O)=C5)CCC6=C4C=C(OC)C(OC)=C6;< 10;NA;44.4 ± 3.9;;;;;;
10e;O=C(N1CCC2=CC(OC)=C(OC)C=C2[C@@H]1C3=CC=C(Cl)C=C3)N([C@H]4C5=CC=C(Cl)C=C5)CCC6=C4C=C(OC)C(OC)=C6;< 10;NA;0.43 ± 0.10;23.9 ± 0.7;49.7 ± 1.7;54.9 ± 9.4;> 100;81.5 ± 0.1;
10f;O=C(N1CCC2=CC(OC)=C(OC)C=C2[C@@H]1C3=CC=C(Br)C=C3)N([C@H]4C5=CC=C(Br)C=C5)CCC6=C4C=C(OC)C(OC)=C6;< 10;NA;2.2 ± 0.5;;;;;;19.1
10g;O=C(N1CCC2=CC(OC)=C(OC)C=C2[C@@H]1C3=CC=C(F)C=C3)N([C@H]4C5=CC=C(F)C=C5)CCC6=C4C=C(OC)C(OC)=C6;< 10;NA;0.072 ± 0.004;16.4 ± 2.1;68.5 ± 2.1;94.3 ± 10.0;72.9 ± 4.0;96.2 ± 16.3;75.2
10h;O=C(N1CCC2=CC(OC)=C(OC)C=C2[C@@H]1C3=CC=C([N+]([O-])=O)C=C3)N([C@H]4C5=CC=C([N+]([O-])=O)C=C5)CCC6=C4C=C(OC)C(OC)=C6;< 10;NA;> 50;;;;;;
10i;O=C(N1CCC2=CC(OC)=C(OC)C=C2[C@@H]1C3=C([N+]([O-])=O)C=C([N+]([O-])=O)C=C3)N([C@H]4C5=CC=C([N+]([O-])=O)C=C5[N+]([O-])=O)CCC6=C4C=C(OC)C(OC)=C6;22.7 ± 1.7;14.2 ± 4.2;> 50;;;;;;
10j;O=C(N1CCC2=CC(OC)=C(OC)C=C2[C@@H]1C3=CC=C(C(F)(F)F)C=C3)N([C@H]4C5=CC=C(C(F)(F)F)C=C5)CCC6=C4C=C(OC)C(OC)=C6;< 10;NA;> 50;;;;;;
10k;O=C(N1CCC2=CC(OC)=C(OC)C=C2[C@@H]1C3=CC=C(OC4=CC=C([N+]([O-])=O)C=C4)C=C3)N([C@H]5C6=CC=C(OC7=CC=C([N+]([O-])=O)C=C7)C=C6)CCC8=C5C=C(OC)C(OC)=C8;< 10;NA;0.18 ± 0.11;;;;;;10.1
10l;O=C(N1CCC2=CC(OC)=C(OC)C=C2[C@@H]1C3=CC(C=CC=C4)=C4C=C3)N([C@H]5C6=CC=C(C=CC=C7)C7=C6)CCC8=C5C=C(OC)C(OC)=C8;< 10;NA;10.6 ± 1.4;;;;;;
10m;O=C(N1CCC2=CC(OC)=C(OC)C=C2[C@@H]1C3=NC(C4=CC([N+]([O-])=O)=CC=C4)=CC=C3)N([C@@H]5C6=CC=CC(C7=CC=CC([N+]([O-])=O)=C7)=N6)CCC8=C5C=C(OC)C(OC)=C8;< 10;NA;> 50;;;;;;
11g;O=C(N1CCC2=CC(OC)=C(OC)C=C2[C@@H]1C3=CC=C(F)C=C3)N([C@@H]4C5=CC=C(F)C=C5)CCC6=C4C=C(OC)C(OC)=C6;< 10;NA;> 50;;;;;;
11j;O=C(N1CCC2=CC(OC)=C(OC)C=C2[C@@H]1C3=CC=C(C(F)(F)F)C=C3)N([C@@H]4C5=CC=C(C(F)(F)F)C=C5)CCC6=C4C=C(OC)C(OC)=C6;< 10;NA;> 50;;;;;;
11k;O=C(N1CCC2=CC(OC)=C(OC)C=C2[C@@H]1C3=CC=C(OC4=CC=C([N+]([O-])=O)C=C4)C=C3)N([C@@H]5C6=CC=C(OC7=CC=C([N+]([O-])=O)C=C7)C=C6)CCC8=C5C=C(OC)C(OC)=C8;< 10;NA;43.7 ± 2.1;;;;;;
16;O=C(NCCC1=CC=C(OC)C(OC)=C1)NCCC2=CC(OC)=C(OC)C=C2;< 10;NA;> 50;;;;;;
18;O=C(N1C(CC)C2=CC(OC)=C(OC)C=C2CC1)NCCC3=CC=C(OC)C(OC)=C3;< 10;NA;> 50;;;;;;
19;O=C(N1C(CCC)C2=CC(OC)=C(OC)C=C2CC1)NCCC3=CC=C(OC)C(OC)=C3;< 10;NA;> 50;;;;;;
20;O=C(N1C(C2=CC=CC=C2)C3=CC(OC)=C(OC)C=C3CC1)NCCC4=CC=C(OC)C(OC)=C4;< 10;NA;1.2 ± 0.3;;;;;;39.6
21;O=C(N1C(C2=C(Cl)C=CC=C2)C3=CC(OC)=C(OC)C=C3CC1)NCCC4=CC=C(OC)C(OC)=C4;< 10;NA;46.1 ± 1.5;;;;;;
22;O=C(N1C(C2=CC=CC([N+]([O-])=O)=C2)C3=CC(OC)=C(OC)C=C3CC1)NCCC4=CC=C(OC)C(OC)=C4;< 10;NA;> 50;;;;;;
23;O=C(N1C(C2=CC=C(Cl)C=C2)C3=CC(OC)=C(OC)C=C3CC1)NCCC4=CC=C(OC)C(OC)=C4;< 10;NA;31.7 ± 1.3;;;;;;
24;O=C(N1C(C2=CC=C(Br)C=C2)C3=CC(OC)=C(OC)C=C3CC1)NCCC4=CC=C(OC)C(OC)=C4;< 10;NA;48.2 ± 3.0;;;;;;
25;O=C(NCCC1=CC(OC)=C(OC)C=C1C(CC)S(C2=CC=C(C)C=C2)(=O)=O)N3C(CC)C4=CC(OC)=C(OC)C=C4CC3;15.3 ± 0.1;26.1 ± 0.1;> 50;;;;;;
26;CC(N1C(C2=CC=C(C(F)(F)F)C=C2)C3=CC(OC)=C(OC)C=C3CC1)=O;< 10;NA;> 50;;;;;;
27;ClC(C=C1)=CC=C1C2C3=CC(OC)=C(OC)C=C3CCN2;< 10;NA;> 50;;;;;;
28;COC1=C(OC)C=C2C(C(C3=CC=C([N+]([O-])=O)C=C3[N+]([O-])=O)NCC2)=C1;< 10;NA;> 50;;;;;;
29;COC1=C(OC)C=C2C(C(C3=NC(C4=CC([N+]([O-])=O)=CC=C4)=CC=C3)NCC2)=C1;< 10;NA;> 50;;;;;;
30;COC1=C(OC)C=C2C(C(C3=NC(C4=CC([N+]([O-])=O)=CC=C4)=CC=C3)=NCC2)=C1;< 10;NA;22.9 ± 3.2;;;;;;
31;O=C([C@@]1([H])N(C/2=O)[C@H](C3=CC=CC=C3)C4=C(C=C(OC)C(OC)=C4)C1)NC2=C/C5=CC(OC)=C(OC)C=C5;14.7 ± 0.1;15.9 ± 0.1;12.8 ± 0.3;;;;;;
32;O=C([C@@]1([H])N(C/2=O)[C@H](C3=CC=C(Br)C=C3)C4=C(C=C(OC)C(OC)=C4)C1)NC2=C/C5=CC(OC)=C(OC)C=C5;< 10;NA;42.4 ± 0.4;;;;;;
33;O=C([C@@]1([H])N(C/2=O)[C@H](C3=CC=CC([N+]([O-])=O)=C3)C4=C(C=C(OC)C(OC)=C4)C1)NC2=C/C5=CC(OC)=C(OC)C=C5;< 10;NA;35.2 ± 2.3;;;;;;
34;O=C([C@@]1([H])N(C/2=O)[C@H](C3=C(Cl)C=CC=C3)C4=C(C=C(OC)C(OC)=C4)C1)NC2=C/C5=CC(OC)=C(OC)C=C5;< 10;NA;39.3 ± 0.3;;;;;;
35;O=C([C@@]1([H])N(C/2=O)[C@H](C3=CC=CC=C3)C4=C(C(OC)=C(C)C(OC)=C4OC)C1)NC2=C/C5=C(OC)C(C)=C(OC)C(OC)=C5;< 10;NA;0.62 ± 0.06;14.2 ± 0.6;68.9 ± 1.5;12.4 ± 1.4;34.3 ± 4.0;> 100;15.6
36;O=C1N[C@H](CC2=C(OC)C(C)=C(OC)C(OC)=C2)C(N[C@@H]1CC3=CC(OC)=C(OC)C(C)=C3OC)=O;NA;NA;> 50;;;;;;
37;O=C1N[C@@H](CC2=C(OC)C=CC(OC)=C2)C(N3[C@@]1([H])CC4=C([C@H]3/C=C/C5=CC=CC=C5)C(OC)=CC=C4OC)=O;< 10;NA;30.6 ± 3.7;;;;;;
38;O=C1N[C@](CC2=C(OC)C(C)=C(OC)C(OC)=C2)([H])C(N3[C@@]1([H])CC4=C([C@@H]3/C=C/C5=CC=CC=C5)C(OC)=C(OC)C(C)=C4OC)=O;26.6 ± 0.4;20.8 ± 3.1;3.2 ± 0.1;;;;;;
39;O=C1N2[C@](CC3=C(OC)C(C)=C(OC)C(OC)=C3[C@@H]2/C=C/C4=CC=CC=C4)([H])C(N5[C@@]1([H])CC6=C([C@@H]5/C=C/C7=CC=CC=C7)C(OC)=C(OC)C(C)=C6OC)=O;< 10;NA;8.8 ± 0.7;;;;;;
